# Supplementary material
Source: HighWire-hosted journal article supplement (https://www.canjsurg.ca/highwire/filestream/98145/field_highwire_adjunct_files/0/CJS-012121-at-1.pdf)
Supplement: CJS-012121-at-1.pdf [file CJS-012121-at-1.pdf]

**Appendix 1** to Murillo Perez CF, Ivanics T, Claasen MPAW, et al. Trends in liver transplantation for autoimmune liver diseases: a Canadian study. *Can J Surg* 2022. Copyright © 2022 The Author(s) or their employer(s). To receive this resource in an accessible format, please contact us at [cmajgroup@cmajca](mailto:cmajgroup@cmajca).

DOI: 10.1503/cjs.012121

*Online appendices are unedited and posted as supplied by the authors.*

**Appendix 1. Baseline characteristics of patients with a liver transplantation for overlap autoimmune liver disease in Canada from 2000 to 2018.**

|                         | <b>PSC-AIH<br/>N=10</b> | <b>PBC-AIH<br/>N=10</b> |
|-------------------------|-------------------------|-------------------------|
| <b>Age of recipient</b> |                         |                         |
| Overall                 | 38 (26-45)              | 47 (41-62)              |
| Female                  | 41 (20-41)              | 43 (40-56)              |
| Male                    | 35 (28-44)              | 62 (49-62)              |
| <b>Sex</b>              |                         |                         |
| Female                  | 3 (30.0)                | 7 (70.0)                |
| Male                    | 7 (70.0)                | 3 (30.0)                |
| Age of donor            | 31 (20-39)              | 47 (21-53)              |
| <b>Sex of donor</b>     |                         |                         |
| Male                    | 4 (40.0)                | 4 (40.0)                |
| Female                  | 6 (60.0)                | 6 (60.0)                |
| <b>Graft type</b>       |                         |                         |
| DCD                     | 1 (10.0)                | 2 (20.0)                |
| NDD                     | 6 (60.0)                | 6 (60.0)                |
| LDLT                    | 3 (30.0)                | 2 (20.0)                |
| MELD score              | 19 (11-23)              | 22 (14-30)              |
| Creatinine (µmol/L)     | 70 (59-99)              | 73 (66-137)             |
| Bilirubin (µmol/L)      | 87 (27-116)             | 246 (49-434)            |
| INR                     | 1.5 (1.3-1.8)           | 1.6 (1.4-2.2)           |

PBC, Primary biliary cholangitis, PSC, primary sclerosing cholangitis; AIH, autoimmune hepatitis; DCD, Donation after cardiac death, NDD, neurologic determination of death, LDLT, living donor liver transplantation; MELD, model for end-stage liver disease, INR, international normalized ratio.

Laboratory data availability according to autoimmune liver disease:

Creatinine, bilirubin, INR, and MELD score available in 9 patients (90%) from each PBC-AIH and PSC-AIH overlap group.
